# Supplementary material for: Computational redesign of a fluorogen activating protein with Rosetta
Source: PLoS Comput Biol. 2021 Nov 8;17(11):e1009555. doi: 10.1371/journal.pcbi.1009555 (PMC8601599; doi:10.1371/journal.pcbi.1009555)
Supplement: S1 Table — (XLSX) [file pcbi.1009555.s001.xlsx]

## Sheet: Sheet1
	DiB-RM DDM	DiB-RM apo	DiB-RM-split DDM
	(PDB ID 7L5K)	(PDB ID 7L5L)	(PDB ID 7L5M)
Wavelength (Å)	0.97872	0.97857	0.97872
Space group	P 31	P 43	P 43 21 2
Unit cell dimensions	a = b = 69.256,	a = b = 44.970,	a = b = 57.146,
	c = 80.156,	c = 158.650,	c = 138.63,
	α = β = 90°,	α = β = γ = 90°	α = β = γ = 90°
	γ = 120°
Resolution range (Å)	33.33 – 1.86	39.12 – 2.01	46.22 – 2.33
	(1.89 – 1.86)	(2.04 – 2.01)	(2.37 – 2.33)
Total no. of reflections	148, 895 (6,905)	106,493 (5,339)	84,479 (2,781)
Unique reflections	3,6055 (1,776)	20,728 (1,063)	10,501 (522)
Completeness (%)	99.8 (98.7)	99.3 (99.7)	100.0 (100.0)
Multiplicity	4.1 (3.9)	5.1 (5.0)	8.0 (5.3)
Mean I / σ(I)	9.1 (2.0)	12.9 (1.8)	10.9 (1.8)
CC1/2	0.995 (0.863)	0.999 (0.644)	0.997 (0.810)
Refinement Statistics
Rwork/Rfree(%)	18.03/22.24	19.75/23.26	23.85/27.87
Average B factor (Å2)	41.6	33.8	59.81
Total no. of atoms	2841	2664	1258
Water molecules	169	122	12
Protein residues	316	313	151
Bond angles (°)	1.89	1.83	1.93
Bond length (Å)	0.016	0.014	0.015
Ramachandran: favored/allowed (%)	98.72/1.28	99.68/0.32	98.64/1.36
Clashscore	4.2	4.61	7.38
Numbers in parentheses are for the highest-resolution shell.
